# Supplementary material for: Theoretical prediction on the stability, elastic, electronic and optical properties of MAB-phase M4AlB4 compounds (M = Cr, Mo, W)
Source: Royal Society of Chemistry journal article supplement (doi:10.1039/d3ra06267h), 2024-01-01
Supplement: d3ra06267h1.pdf [file d3ra06267h1.pdf]

## Supplementary material

In this study, convergence tests were conducted on the  $\text{Cr}_4\text{AlB}_4$ . The results of the tests are presented in Fig.S1. To achieve convergence, a cutoff energy of 750 eV or more and a k-point mesh separation of less than  $0.03 \text{ \AA}^{-1}$  were necessary. During the convergence test on Encut, the K-space was set to  $0.04 \text{ 1/\AA}$ . The convergence test on K-space was performed using an Encut of 750 eV.

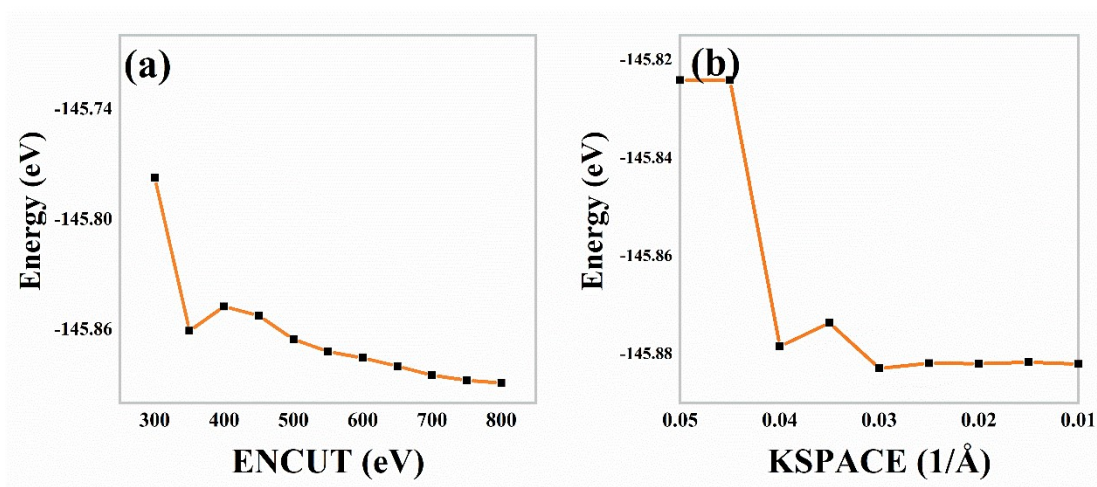

Fig.S1 Convergence test results for (a) Encut and (b) K-space
